# Supplementary material
Source: PubMed Central journal article supplement (PMC5698065)
Supplement: ASN.2016121278SupplementaryData.pdf [file ASN.2016121278SupplementaryData.pdf]

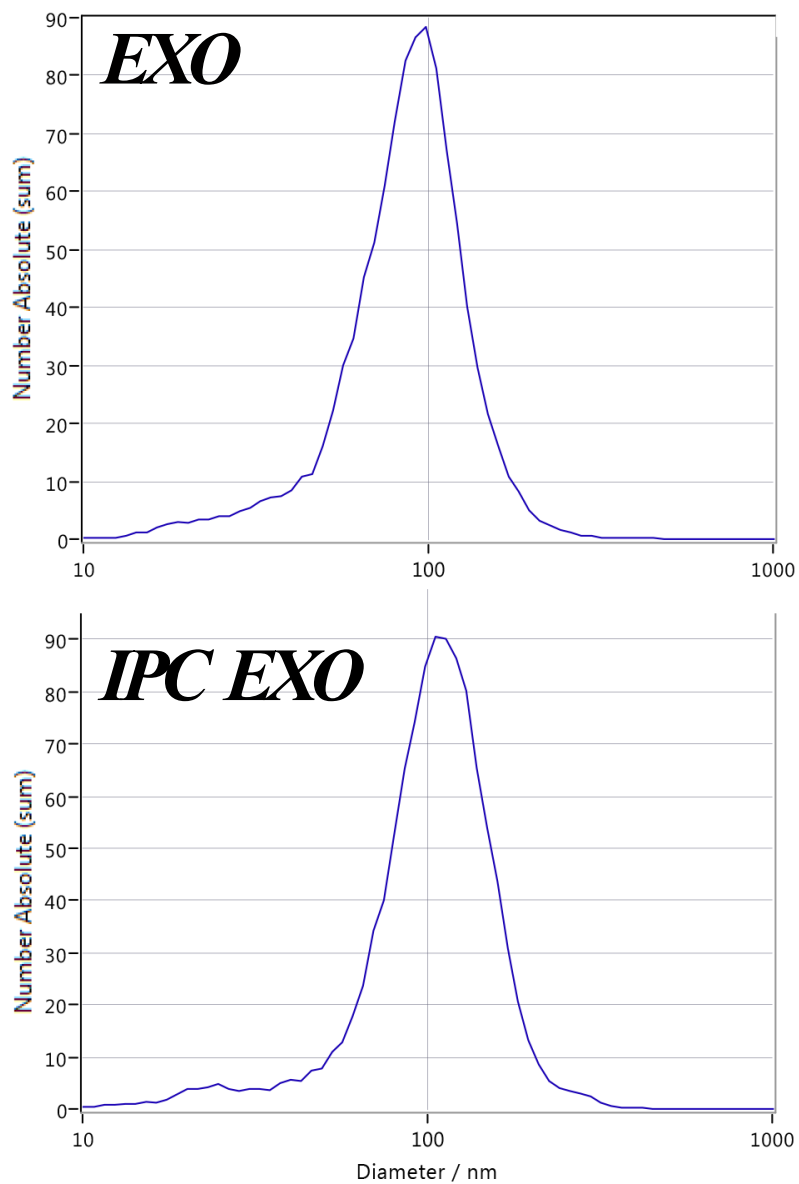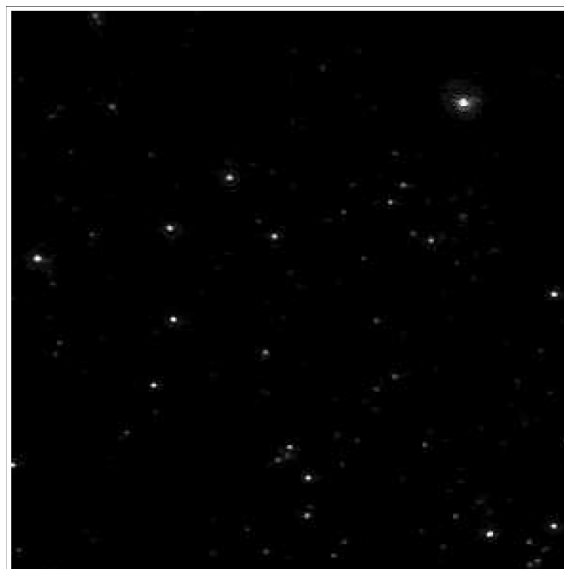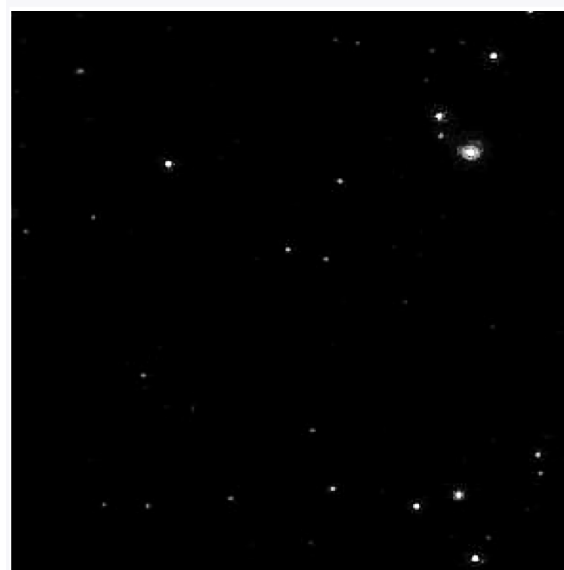

Figure 1S. Representative Nanotrack Plots and image of EV showing size distribution of EV.

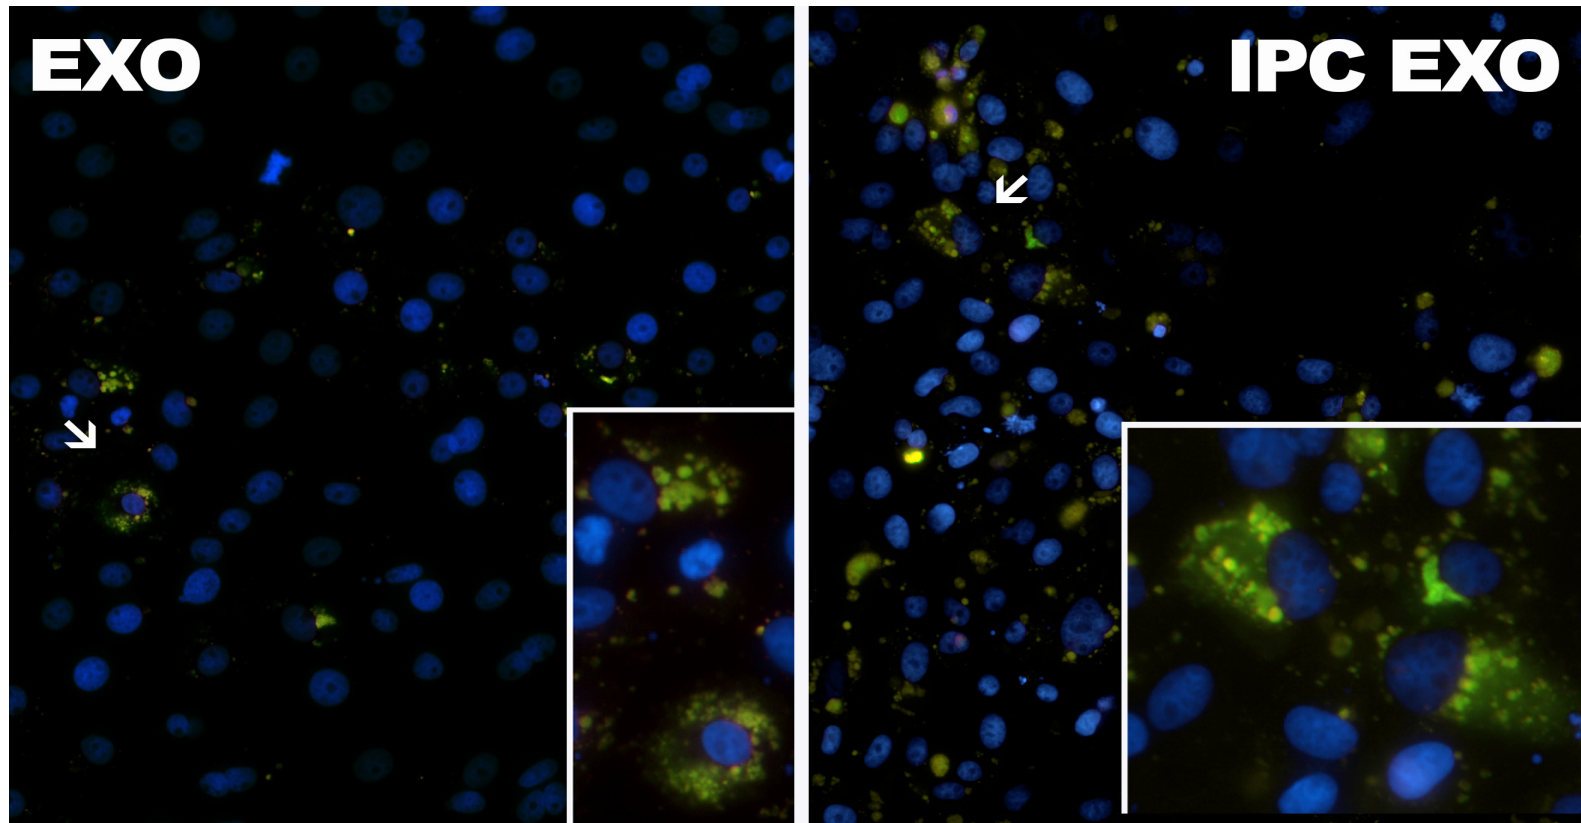

Figure 2S. Representative images of EV uptake by cultured renal tubular cells. EV, labeled with green exoglow, were rapidly taken up by cultured tubular cells exposed to Hoescht to label nuclei blue. Uptake of IPC EXO was greater than than of EXO ( $p < 0.05$ ). Insets show areas at arrows.

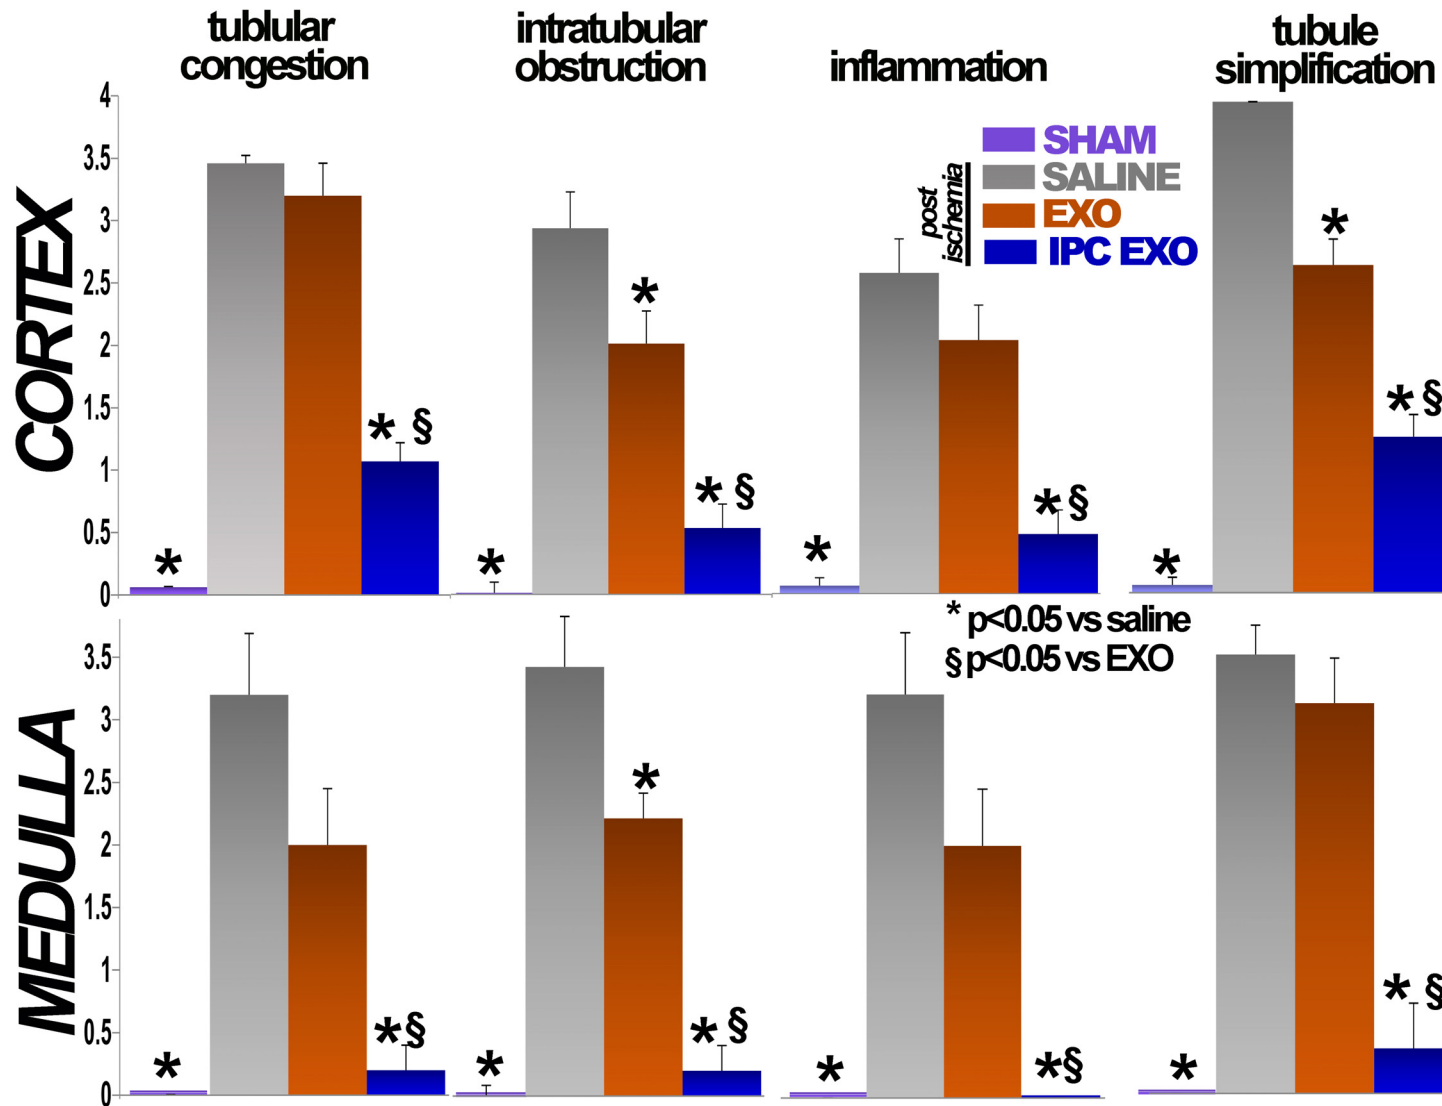

Figure 3S. Quantification of Histological Injury. Tubular congestion, intratubular obstruction (casts), inflammation and tubule simplification in blinded sections of cortex and medulla were graded on the follow scale: 0=none; 1+ = <10%, 2+ = 10-25%, 3+ = 26-75%, 4+ = >75%.

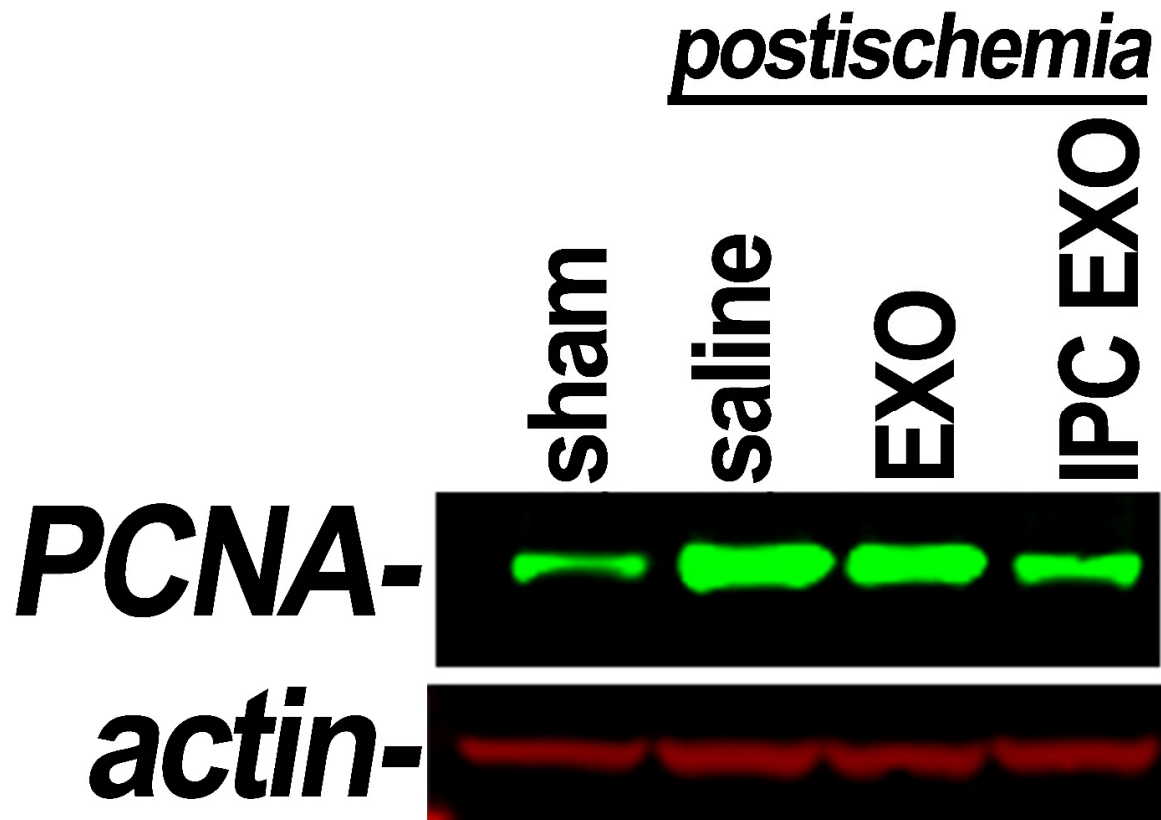

Figure 4S. Representative western blot of proliferative cell nuclear antigen (PCNA) protein levels in the four groups of rats (green), n = 2 blots: sham control, untreated ischemic (saline), ischemic treated with normoxic exosomes (exo) and ischemic treated with IPC exosomes (IPC exo). The corresponding actin levels are also included (red).

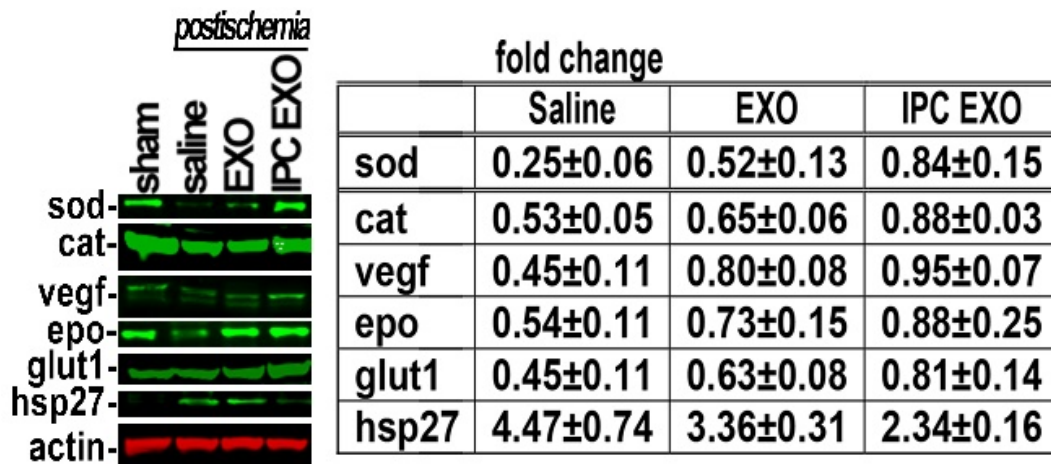

Figure 5S. Left, representative western blot of proteins suppressed by ischemia and partly supported by treatment with normoxic exosomes (exo) and IPC exosomes (IPC exo), n = 5: superoxide dismutase 1 (SOD, sham vs saline and IPC exo vs saline, p < 0.05); catalase (CAT, sham vs saline and IPC exo vs saline, p < 0.05); vascular endothelial growth factor (VEGF, IPC exo vs saline, p < 0.01); erythropoietin (EPO, sham vs saline and IPC exo vs saline, p < 0.05); glucose transporter 1 (GLUT1 or Slc2a1, sham vs saline and IPC exo vs saline, p < 0.05). In ischemia, heat shock protein 27 (hsp27) was increased (P<0.05), IPC exo limited its activation (p<0.05). Protein levels were all normalized for actin levels (red).

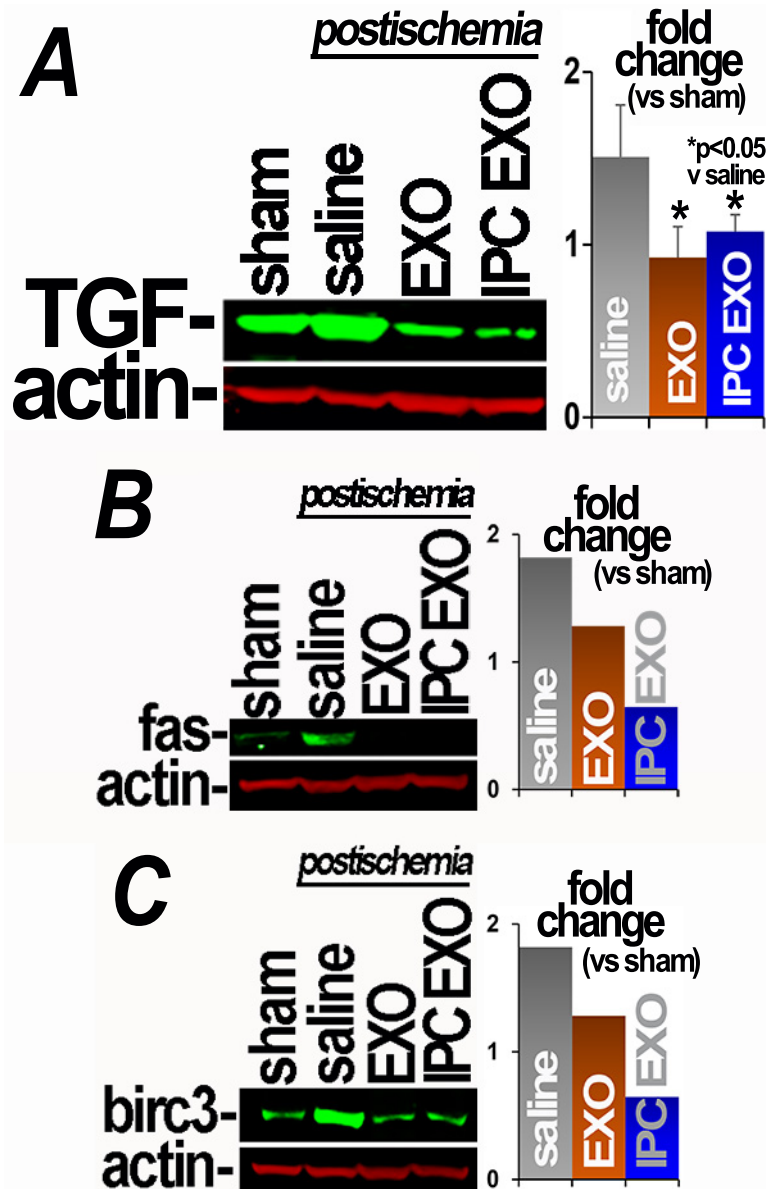

Figure 6S. Representative western blots: A, transforming growth factor (TGF); B, pro-apoptotic fas; and C, anti-apoptotic birc3 protein levels in four groups of rat kidneys (green): sham control, untreated postischemic (saline), postischemic treated with normoxic EV (EXO) and postischemic treated with IPC EV (IPC EV). The graphs shows the fold change in mean TGF/actin (n=3), fas/actin (n=2) and birc3/actin (n=2) band density as compared to sham.

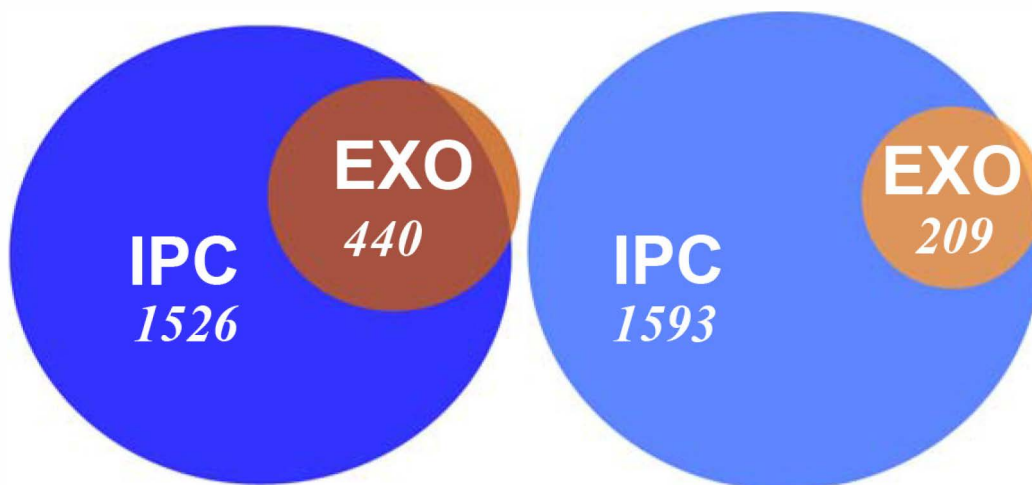

**Kegg pathway**  
**Metabolic  $p=2.79e15$**

**GO analysis**  
**Transporter activity**  
 **$p=1.02e10$**

| Number of transcripts |    |
|-----------------------|----|
| Anti-apoptotic        | 39 |
| Anti-inflammatory     | 29 |
| Pro-vasculature       | 8  |
| Anti-fibrosis         | 12 |

Figure 7S. Many transcripts were altered in untreated renal ischemia: either suppressed (left) or activated (right). IPC EXO treatment significantly restored 1526 suppressed genes, and significantly restored 1593 activated genes. Whereas EXO restored 440 suppressed genes and restored 209 activated genes ( $p<0.05$  for all treatment groups with respect to untreated ischemia). Most genes restored by EXO overlapped the genes restored by IPC. The most significantly altered Kegg pathway was metabolic. The table categorizes 89 restored transcripts in both IPC EXO and EXO in potentially beneficial systems.

**RNASeq in exosomes**

■ IPC

■ EXO

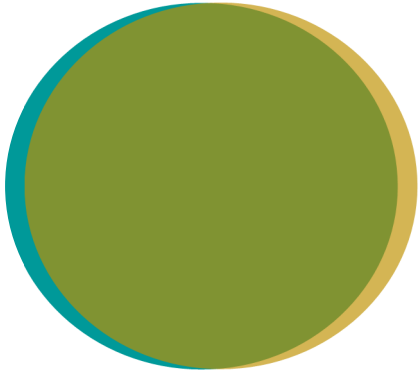

**Kegg pathway**

Ribosome  $p=0.0003$

**GO analysis**

RNA processing  $p=0.002$

Figure 8S. RNA Seq in EV showed 24 differentially expressed transcripts between IPC and neutral EXO with the most altered pathway being the ribosome.



|                          | heat inactivated<br>EXO group | P value v<br>saline | P value v<br>EXO |
|--------------------------|-------------------------------|---------------------|------------------|
| 24 h creatinine (mg/dl)  | 2.2±0.1                       | NS                  | NS               |
| 48 h creatinine (mg/dl)  | 1.62±0.3                      | NS                  | 0.07             |
| Weight (mg/300g body wt) | 2.6±0.2                       | NS                  | <0.05            |
| fraction damaged tubules | 0.72±0.04                     | <0.05               | <0.05            |
| PMN/hpf                  | 5.1±0.9                       | <0.05               | <0.05            |
| C3 pixel density         | 65±2.4                        | NS                  | <0.05            |
| Fibrosis (% area)        | 0.19±0.001                    | NS                  | <0.05            |
| Microvascular density    | 0.86±0.05                     | NS                  | NS               |

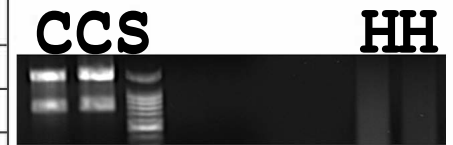

**C, control RNA**  
**S, size standard**  
**H, heated IPC EXO RNA**

Table 1S. Heat-inactivated EV are not protective. The table shows multiple parameters in postischemic rats that had been treated with heated EV at 24 and 48 hours postischemia. Although protein levels were not significantly different between control and heated EV, RNA was not found in EV after heat inactivation (right).

|                                 | <b>NS v<br/>SHAM</b> | <b>EXO v<br/>SHAM</b> | <b>IPC V<br/>SHAM</b> | <b>IPC v NS</b> |
|---------------------------------|----------------------|-----------------------|-----------------------|-----------------|
| <b>Pathway</b>                  | <b>p value</b>       | <b>p value</b>        | <b>p value</b>        | <b>p value</b>  |
| Metabolic Pathways              | 9.47 e-92            | 2.75 e-35             | ---                   | 1.39 e-41       |
| Proliferation*                  | 1.16 e -29           | 4.66 e-18             | ---                   | 3.59 e-16       |
| Focal adhesion                  | 8.97 e-25            | 1.31 e-16             | 0.0029                | 3.51 e-09       |
| Filtrate absorption#            | 5.83 e-21            | 8.32 e-15             | 0.0002                | 7.61 e-12       |
| Cell cycle                      | 3.88 e-20            | 1.20 e-16             | ---                   | 8.18 e-17       |
| ECM-receptor interaction        | 1.14 e-17            | 3.55 e-12             | 5.08 e-06             | 1.34 e-07       |
| Oxidative phosphorylation       | 1.08 e-16            | ---                   | ---                   | 0.0155          |
| Glutathione metabolism          | 1.74 e-14            | ---                   | ---                   | 2.28 e-08       |
| Phagosome                       | 1.99 e-14            | 1.76 e-10             | ---                   | 2.42 e-11       |
| Apoptosis                       | 2.27 e-10            | 1.47 e-05             | ---                   | 2.42 e-06       |
| Cytokine-cytokine R interaction | 5.74 e-14            | 8.15 e-11             | ---                   | 1.33 e -09      |
| DNA replication                 | 2.67 e-07            | --                    | ---                   | 1.48 e-08       |

In Kegg classification, pathway listed as cancer (\*) protein digestion and absorption (#)

Table 2S. Differentially expressed Kegg pathways in untreated and EXO and EXO IPC treated renal ischemia. Data include the entire set of transcriptomes in the four groups of rats

| <i>gene</i>         | <i>fold change</i> | <i>P value</i> |
|---------------------|--------------------|----------------|
| <b>Lrrc56</b>       | 16.19684           | 3.26E-07       |
| <b>Drd4</b>         | 78.49808           | 6.06E-06       |
| <b>Ptdss2</b>       | 8.283269           | 2.55E-05       |
| <b>Phrf1</b>        | 3.93936            | 0.0004027      |
| <b>Rn28s</b>        | 0.270428           | 0.0005771      |
| <b>Rn45s</b>        | 0.296246           | 0.0009219      |
| <b>Eps8l2</b>       | 4.501065           | 0.0014974      |
| <b>Tmem80</b>       | 10.53305           | 0.0022572      |
| <b>Ugt2b1</b>       | 3.238392           | 0.002616       |
| <b>Ugt2b10</b>      | 3.238402           | 0.002628       |
| <b>Mir3574</b>      | 20.63152           | 0.0027636      |
| <b>Ddx39b</b>       | 0.39594            | 0.0043904      |
| <b>Fau</b>          | 0.689794           | 0.0055902      |
| <b>Rps6</b>         | 2.338801           | 0.0061934      |
| <b>Rps13</b>        | 1.380476           | 0.0085318      |
| <b>LOC102549726</b> | 0.307007           | 0.0151298      |
| <b>Rassf7</b>       | 2.915573           | 0.0208718      |
| <b>Minos1</b>       | 0.507992           | 0.0217366      |
| <b>Anxa1</b>        | 1.300553           | 0.0255786      |
| <b>LOC100911483</b> | 0.411889           | 0.027246       |
| <b>Pfn1</b>         | 0.68795            | 0.0275072      |
| <b>Mtap</b>         | 0.233285           | 0.0393567      |
| <b>Clic1</b>        | 0.629333           | 0.04683        |
| <b>Rnh1</b>         | 0.512802           | 0.0486232      |
| <b>Tubb5</b>        | 0.682995           | 0.0508805      |
| <b>Cox7a2l</b>      | 1.670835           | 0.0540679      |
| <b>Eif3m</b>        | 1.372874           | 0.0651085      |
| <b>Fam129b</b>      | 0.774576           | 0.0735416      |
| <b>Ltb</b>          | 0.29788            | 0.0866235      |
| <b>Atp6v1g2</b>     | 0.29779            | 0.0877447      |
| <b>RT1-CE10</b>     | 0.24278            | 0.0929345      |
| <b>Rps8</b>         | 1.254032           | 0.0933281      |
| <b>Rps15a</b>       | 0.754515           | 0.0955748      |
| <b>Eif3k</b>        | 1.920594           | 0.1102808      |
| <b>Rpl17</b>        | 1.272594           | 0.112006       |
| <b>Cd63</b>         | 0.648305           | 0.112629       |
| <b>RT1-CE2</b>      | 0.331922           | 0.1185701      |
| <b>Dynll1</b>       | 0.650672           | 0.1206252      |
| <b>Ddt</b>          | 0.503037           | 0.1212101      |
| <b>Cfdp1</b>        | 1.415932           | 0.1224761      |
| <b>Atp5g3</b>       | 0.693078           | 0.1231189      |
| <b>Rpl27</b>        | 1.237502           | 0.1236026      |

|           |          |           |
|-----------|----------|-----------|
| Taldo1    | 1.604253 | 0.1238283 |
| Rps3a     | 1.237234 | 0.1290179 |
| Nrep      | 0.47773  | 0.1314657 |
| Rbm3      | 1.341765 | 0.1332759 |
| RT1-CE12  | 0.37312  | 0.1364004 |
| Ube2s     | 0.610861 | 0.1428263 |
| Pabpc1    | 1.257365 | 0.1488621 |
| Rps24     | 0.821989 | 0.1493474 |
| Cd24      | 1.250384 | 0.1529263 |
| Psmb1     | 1.461866 | 0.153649  |
| RT1-CE1   | 0.390259 | 0.1550898 |
| Rpl30     | 1.303759 | 0.1646442 |
| Ppp1ca    | 1.424261 | 0.1678137 |
| Hnrnpa2b1 | 0.748745 | 0.175859  |
| Hnrnpa1   | 1.245239 | 0.1778314 |
| Skp1      | 1.304902 | 0.1832875 |
| Pla2g16   | 1.719821 | 0.184658  |
| Atp5b     | 0.8284   | 0.1946005 |
| Eef2      | 0.822913 | 0.2015693 |
| Rpsa      | 1.197804 | 0.2037134 |
| Txn1      | 0.686598 | 0.2058584 |
| Hsp90aa1  | 1.212961 | 0.2105127 |
| Atp5g2    | 0.739137 | 0.2166733 |
| Fkbp1a    | 0.806462 | 0.2166977 |
| Atp6v1g1  | 0.743283 | 0.2295635 |
| Fmr1      | 1.744195 | 0.2407201 |
| Uqcr10    | 1.955778 | 0.242598  |
| Akr1a1    | 0.846383 | 0.2449587 |
| Cox7a2    | 0.756662 | 0.2480775 |
| Rpl37     | 0.784878 | 0.2525435 |
| Slc25a5   | 1.376195 | 0.2621689 |
| S100a10   | 1.148694 | 0.2640821 |
| Rps26     | 1.284187 | 0.2652901 |
| Rps21     | 1.209257 | 0.2665313 |
| Rpl24     | 1.153315 | 0.2680652 |
| Eif3h     | 0.802052 | 0.2687002 |
| Calm1     | 1.190372 | 0.2707449 |
| Rps11     | 1.167072 | 0.2709647 |
| Npm1      | 1.203589 | 0.2722887 |
| Eif5a     | 0.856515 | 0.2767545 |
| Eefsec    | 2.007712 | 0.2782998 |
| Ccl2      | 0.703501 | 0.2837439 |
| Rps20     | 0.834438 | 0.2862785 |
| Gstp1     | 1.18054  | 0.295941  |

|           |          |           |
|-----------|----------|-----------|
| S100a11   | 0.856361 | 0.2967193 |
| Anp32a    | 1.169359 | 0.2984425 |
| Ncl       | 1.179824 | 0.3067983 |
| Eif1      | 0.844571 | 0.3098891 |
| Gabarap   | 1.229229 | 0.3104298 |
| RT1-CE5   | 0.643873 | 0.3191237 |
| Psm7      | 1.311407 | 0.3191301 |
| Cox7c     | 1.314293 | 0.3209647 |
| Tpm4      | 0.864358 | 0.3211267 |
| Psmb4     | 0.838391 | 0.3238268 |
| Hspa1b    | 0.764356 | 0.3257658 |
| Gpx4      | 0.76898  | 0.3302108 |
| Rps27a    | 1.16923  | 0.332307  |
| Rplp1     | 1.157418 | 0.3365376 |
| Oaz1      | 1.141339 | 0.3366418 |
| Rpl31     | 1.16545  | 0.3380286 |
| Sumo2     | 1.299053 | 0.3381638 |
| Naca      | 0.885164 | 0.3398111 |
| Irf7      | 0.413371 | 0.342284  |
| Nap1l1    | 1.146845 | 0.3453079 |
| Taf15     | 1.241188 | 0.3522772 |
| Ptma      | 1.135475 | 0.3567916 |
| Bex1      | 0.773795 | 0.3580473 |
| Ap2m1     | 0.812035 | 0.3606806 |
| Pgam1     | 0.818519 | 0.361135  |
| Atp6v0c   | 0.769529 | 0.3666519 |
| Tagln2    | 1.162377 | 0.3720678 |
| Phf5a     | 0.684477 | 0.3747457 |
| Btf3      | 1.144621 | 0.3779764 |
| Rps23     | 1.117397 | 0.3789969 |
| Cdc42se1  | 0.806276 | 0.3790978 |
| Tceb2     | 0.781878 | 0.3807514 |
| Rpl35a    | 0.825949 | 0.3985928 |
| RT1-CE7   | 0.594312 | 0.4030576 |
| Clta      | 0.845074 | 0.4047845 |
| RT1-CE11  | 0.597632 | 0.4049716 |
| LOC688869 | 0.787394 | 0.4211151 |
| Rpl10a    | 0.893571 | 0.4272844 |
| Ran       | 1.12744  | 0.427463  |
| Cox5a     | 1.206173 | 0.4297347 |
| Rpl29     | 1.12809  | 0.4352454 |
| Myl12b    | 0.876199 | 0.4396517 |
| Eif3g     | 0.825507 | 0.4412582 |
| Ubxn1     | 1.143078 | 0.4422194 |

|            |          |           |
|------------|----------|-----------|
| Pkm        | 0.837445 | 0.4492772 |
| Rps25      | 1.131239 | 0.4495111 |
| Ftl1       | 1.125947 | 0.4502224 |
| Arpc3      | 1.231225 | 0.453335  |
| Krt8       | 0.876578 | 0.4565726 |
| Rpl5       | 1.124749 | 0.4582947 |
| Cox4i1     | 0.84107  | 0.4584987 |
| Eif2s1     | 0.817872 | 0.4587609 |
| Rps18      | 1.102073 | 0.4589225 |
| Tuba1c     | 0.885939 | 0.4617327 |
| Mir1843b   | 0.513414 | 0.4633045 |
| S100a6     | 1.239133 | 0.4651814 |
| Tagln      | 0.845279 | 0.4759817 |
| Mllt11     | 0.570966 | 0.480076  |
| Gnb2l1     | 1.10397  | 0.4843559 |
| Rps15      | 1.126447 | 0.4862987 |
| Hint1      | 1.245795 | 0.4926176 |
| Anxa5      | 0.872895 | 0.4939825 |
| Slc25a4    | 1.164717 | 0.5028693 |
| Rpl14      | 1.09488  | 0.5078502 |
| RGD1560212 | 0.752566 | 0.5094949 |
| Ywhae      | 0.844116 | 0.5124516 |
| Hsp90ab1   | 1.09692  | 0.5128616 |
| Rpl39      | 1.131763 | 0.5147275 |
| Bc1        | 1.225677 | 0.5155934 |
| Arpc2      | 0.881537 | 0.5170883 |
| Nedd8      | 0.837991 | 0.5177774 |
| Ost4       | 1.207691 | 0.5218714 |
| Rps10      | 0.906872 | 0.5263327 |
| Vamp8      | 0.668615 | 0.5275603 |
| Sema6c     | 0.879467 | 0.5326785 |
| Atp5h      | 0.800661 | 0.5533324 |
| Net1       | 0.918908 | 0.556796  |
| Setdb1     | 0.626909 | 0.5582528 |
| Prr13      | 0.821144 | 0.5591506 |
| Rpl22      | 1.130581 | 0.5647353 |
| Ppia       | 1.087658 | 0.5656269 |
| Actb       | 0.921363 | 0.5685723 |
| Atp5g1     | 0.774983 | 0.5693493 |
| Aldoa      | 0.926856 | 0.5742425 |
| Gpx1       | 1.159759 | 0.5765184 |
| Atpif1     | 1.197276 | 0.577025  |
| Rpl26      | 1.079297 | 0.5790565 |
| Dynlrb1    | 0.856332 | 0.5803291 |

|           |          |           |
|-----------|----------|-----------|
| Ubb       | 1.080049 | 0.5831251 |
| Atp5i     | 0.823757 | 0.5832494 |
| Rps7      | 1.074743 | 0.5854094 |
| Rpl18a    | 0.918343 | 0.5869659 |
| Rpl34     | 0.922835 | 0.587038  |
| Mrpl17    | 1.19489  | 0.5889211 |
| Hras      | 1.215426 | 0.5905863 |
| Anxa2     | 0.927109 | 0.5943318 |
| Gas5      | 0.761059 | 0.596497  |
| Rpl19     | 0.921853 | 0.5974182 |
| Ybx1      | 1.071817 | 0.598626  |
| Ybx1-ps3  | 1.071805 | 0.5988658 |
| Rpl36     | 0.918713 | 0.6059161 |
| Mir186    | 1.490943 | 0.6061228 |
| Rpl221    | 0.887405 | 0.607431  |
| Gapdh     | 1.07394  | 0.6119164 |
| Rpl18     | 0.936493 | 0.6121435 |
| Mir7a-1   | 1.527482 | 0.6184054 |
| Mgp       | 1.370084 | 0.6196138 |
| Arpc1b    | 0.925357 | 0.6203871 |
| Tpi1      | 1.094767 | 0.6272966 |
| Fth1      | 1.087925 | 0.631166  |
| Kif1c     | 0.937281 | 0.6403018 |
| Rpl23     | 1.068558 | 0.6450173 |
| Cdc37     | 0.907195 | 0.6451968 |
| Cers2     | 0.903562 | 0.6490774 |
| Prdx6     | 0.867922 | 0.6551477 |
| Pebp1     | 0.903556 | 0.6553389 |
| Atp5e     | 1.128412 | 0.6586591 |
| Nsa2      | 1.124802 | 0.6593335 |
| Deaf1     | 1.51687  | 0.6597719 |
| Rps4x     | 0.936393 | 0.6661336 |
| LOC689574 | 1.209821 | 0.6700299 |
| Snrpd2    | 0.872997 | 0.6705857 |
| Rpl10     | 0.942869 | 0.6768858 |
| Atp5l     | 1.120157 | 0.6807349 |
| Tuba4a    | 1.147543 | 0.6847105 |
| Eef1a1    | 1.060202 | 0.6908095 |
| Rpl7      | 1.06568  | 0.7003146 |
| Apol9a    | 1.305528 | 0.7003316 |
| Tnf       | 0.793562 | 0.7084428 |
| Glrx3     | 1.079026 | 0.7093485 |
| Rplp0     | 0.948217 | 0.7100793 |
| Rpl35     | 1.08981  | 0.7117531 |

|            |          |           |
|------------|----------|-----------|
| Spp1       | 1.087624 | 0.7177463 |
| Rpl13      | 1.050367 | 0.7199709 |
| Kctd10     | 1.049838 | 0.7221687 |
| RT1-CE6    | 0.739749 | 0.7294701 |
| Nme2       | 0.940854 | 0.7322649 |
| Anp32b     | 1.06156  | 0.7323684 |
| H2afz      | 0.922357 | 0.7332644 |
| Atp5j      | 0.881965 | 0.7339682 |
| Prdx2      | 1.052526 | 0.7448864 |
| Ndufv3     | 1.168331 | 0.7453687 |
| Actg1      | 0.952824 | 0.7459469 |
| Rpl36al    | 0.912745 | 0.7519278 |
| Pgk1       | 0.934738 | 0.7566777 |
| Rpl37a-ps1 | 0.912298 | 0.7594105 |
| Rpl21      | 0.950298 | 0.7597947 |
| Rpl38      | 0.919155 | 0.7605254 |
| Cox6c      | 0.921217 | 0.7606448 |
| Lgals3     | 0.931137 | 0.7637967 |
| Tpt1       | 1.046282 | 0.7694822 |
| Csnk2b     | 1.089492 | 0.7708616 |
| Calr       | 0.9617   | 0.7708902 |
| Mir207     | 0.775739 | 0.7719874 |
| Rps14      | 0.962285 | 0.7727725 |
| Lta        | 0.835344 | 0.7737796 |
| Rpl4       | 1.042309 | 0.7792766 |
| Mir3064    | 1.240944 | 0.7817236 |
| Rps12      | 1.035005 | 0.782746  |
| Rpl32      | 1.036145 | 0.7861538 |
| Mif        | 0.929525 | 0.7877495 |
| Arpp19     | 0.849313 | 0.7889673 |
| Cox7b      | 1.069265 | 0.8013971 |
| Uba52      | 0.96798  | 0.8103173 |
| Dstn       | 1.034023 | 0.8111642 |
| Rpl41      | 0.964556 | 0.8118491 |
| Gpx2       | 0.938774 | 0.8130104 |
| Sat1       | 1.04026  | 0.8149929 |
| Cfl1       | 0.974649 | 0.8201299 |
| Myeov2     | 0.902782 | 0.8250237 |
| Rps27      | 1.04381  | 0.8271308 |
| Cdc42      | 1.037834 | 0.8358183 |
| Tp53inp2   | 1.026886 | 0.8376532 |
| Fxyd2      | 1.084099 | 0.8381056 |
| Rpl6       | 0.973352 | 0.8382874 |
| Coa3       | 1.07556  | 0.8384823 |



|           |          |           |
|-----------|----------|-----------|
| Chmp3     | 0.953033 | 0.8406023 |
| Ccng1     | 0.968435 | 0.8428834 |
| Atp5d     | 1.061233 | 0.8514214 |
| Myl12a    | 1.023074 | 0.8532691 |
| Atp5o     | 0.954268 | 0.8703125 |
| Ndufa1    | 1.108824 | 0.8724803 |
| Eno1      | 0.978673 | 0.8755616 |
| Pmepa1    | 1.047201 | 0.876194  |
| Tuba1a    | 0.974824 | 0.877689  |
| Rps3      | 1.022198 | 0.8797707 |
| RT1-CE3   | 1.122018 | 0.8829357 |
| Rpl28     | 0.983611 | 0.8904055 |
| Ndufb4    | 0.928273 | 0.8907963 |
| Tomm20    | 1.036334 | 0.8942282 |
| Tmsb4x    | 0.97827  | 0.8987523 |
| Rpl3      | 1.01825  | 0.8990121 |
| Ivns1abp  | 0.961778 | 0.9011038 |
| Psmb7     | 1.029249 | 0.9038833 |
| Tuba1b    | 0.98305  | 0.9061238 |
| Mt2A      | 0.958631 | 0.9063594 |
| Mir3583   | 1.096327 | 0.9178901 |
| Rpl13a    | 0.984344 | 0.9241297 |
| Snrpg     | 1.026437 | 0.9304076 |
| Rpl9      | 0.98469  | 0.9334294 |
| Prdx1     | 0.987126 | 0.9345581 |
| Tmsb10    | 1.012851 | 0.9426112 |
| Rpl23a    | 0.990667 | 0.9453443 |
| Hspa8     | 0.991364 | 0.9453964 |
| LOC252890 | 0.965323 | 0.9485038 |
| Rps5      | 1.007585 | 0.9507977 |
| Rps29     | 1.009315 | 0.9566838 |
| Rps2      | 0.991934 | 0.9594823 |
| Eef1g     | 0.993331 | 0.960309  |
| Eif4a1    | 1.008239 | 0.9609216 |
| Nfkbil1   | 0.974439 | 0.962564  |
| Psm2      | 1.015447 | 0.9669022 |
| Rps17     | 0.995146 | 0.9777611 |
| Fam63a    | 1.005073 | 0.9827277 |
| Tomm7     | 1.008497 | 0.983385  |
| Preli1    | 1.004061 | 0.9879881 |
| Tpm1      | 0.997898 | 0.9890512 |
| Tbca      | 0.99672  | 0.9916308 |
| Cox17     | 1.004673 | 0.9931595 |
| Rab13     | 1.001251 | 0.9948289 |

|        |          |           |
|--------|----------|-----------|
| Ldha   | 0.999074 | 0.9953579 |
| Rpl12  | 1.000357 | 0.997858  |
| Uqcr11 | 0.99946  | 0.998225  |
| Wbp5   | 0.999652 | 0.9988384 |
| Psm6   | 0.999706 | 0.9988979 |
| Rps28  | 0.999894 | 0.9995591 |

Table 3S. RNASeq in IPC and normoxic exosomes: fold change of IPC exosomes/ normoxic exosomes and p-values are presented.
